# Supplementary material
Source: Elsevier journal article supplement (https://www.sciencedirect.com/science/article/pii/S0300289622005075)
Supplement: mmc1 [file S0300289622005075:mmc1.pdf]

## IMAGEN CLÍNICA

### Título: Visualización endoscópica del interior de una lesión pulmonar cavitada.

#### Autores:

Anna Torrente-Nieto<sup>a1</sup>, Eric Rojas Calvera <sup>a2</sup>, Manel Haro-Estarriol <sup>a3</sup>

<sup>a</sup>Servicio de Neumología, Hospital Universitario Dr. Josep Trueta de Gerona, Hospital Santa Caterina de Salt e Instituto de Investigación Biomédica de Gerona (IDIBGI), Gerona, Cataluña, España.

Avda. França s/n. 17007 Girona, España.

<sup>a1</sup>[atorrente.girona.ics@gencat.cat](mailto:atorrente.girona.ics@gencat.cat)

<sup>a2</sup>[ericrojas.girona.ics@gencat.cat](mailto:ericrojas.girona.ics@gencat.cat)

<sup>a3</sup>[mharo.girona.ics@gencat.cat](mailto:mharo.girona.ics@gencat.cat)

#### Correspondencia:

Anna Torrente Nieto

Hospital Universitario Josep Trueta de Girona

Avda. França s/n

17007 Girona, España

Email: [atorrente.girona.ics@gencat.cat](mailto:atorrente.girona.ics@gencat.cat)

## Visualización endoscópica del interior de una lesión pulmonar cavitada.

Varón de 77 años, exfumador de 40 paquetes-año en el que se evidenció casualmente una lesión cavitada en el lóbulo superior izquierdo en la radiografía y la TC (figura 1A). La fibrobroncoscopia permitió acceder a la cavitación mostrando unas paredes irregulares y aislados restos necróticos (figura 1B-1C). Las biopsias de la cavitación mostraron signos inflamatorios mientras el broncoaspirado y el lavado de la zona fueron negativos en citología y microbiología. Se descartó patología autoinmune con la anamnesis, la exploración física y la analítica. La PET-TC confirmó un aspecto crónico y se diagnosticó de una lesión cavitada residual con un seguimiento posterior durante 2 años sin cambios.

Las cavidades son espacios llenos de aire con un grosor de pared mayor de 4 mm que obligan a un diagnóstico diferencial amplio basado en diferentes exploraciones que no permiten su visión directa como el análisis del esputo, la fibrobroncoscopia, las biopsias dirigidas y las pruebas de imagen <sup>(1)</sup>. La entrada y visión de la cavitación, como en nuestro caso, es excepcional y permitió la obtención de muestras directas excluyendo las principales etiologías, evitó técnicas más invasivas o una cirugía y facilitó el seguimiento con un menor riesgo de obviar una patología grave <sup>(1,2)</sup>.

### Bibliografía

1. Gadkowski LB, Sout JE. Cavitory Pulmonary Disease. Clin Microbiol Rev. 2008;21(2):305-333. <https://doi.org/10.1128/CMR.00060-07>
2. Chien-Yeh C, Yi-Chen Y, Sheng-Wei P. Cavitory Mycobacterium avium complex lung disease developed after immunotherapy. Arch Bronconeumol. 2022;58:174. <https://doi.org/10.1016/j.arbres.2021.04.014>

### FIGURA.

A. Cavidad pulmonar del lóbulo superior izquierdo asociada a engrosamiento pleural, pérdida de volumen pulmón izquierdo, bronquiectasias y enfisema. Se observa el bronquio lobar superior izquierdo que, a través del segmento apical, se conecta con la cavidad. B. División subsegmentaria del bronquio apical izquierdo evidenciándose la cavidad en su interior. C. Visualización de la cavidad con mucosa de aspecto necrótico e inflamatorio.

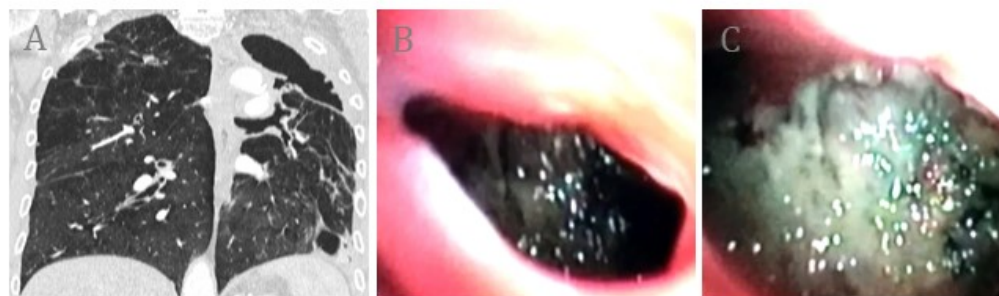

Figura 1: A. Cavity pulmonar del lóbulo superior izquierdo asociada a engrosamiento pleural, pérdida de volumen pulmón izquierdo, bronquiectasias y enfisema. Se observa el bronquio lobar superior izquierdo que, a través del segmento apical, se conecta con la cavidad. B. División subsegmentaria del bronquio apical izquierdo evidenciándose la cavidad en su interior. C. Visualización de la cavidad con mucosa de aspecto necrótico e inflamatorio.
